# Supplementary material for: Chronic pain is common in mitochondrial disease
Source: PubMed Central journal article supplement (PMC7306151; doi:10.1016/j.nmd.2020.02.017), 2020-05
Supplement: mmc2.pdf [file mmc2.pdf]

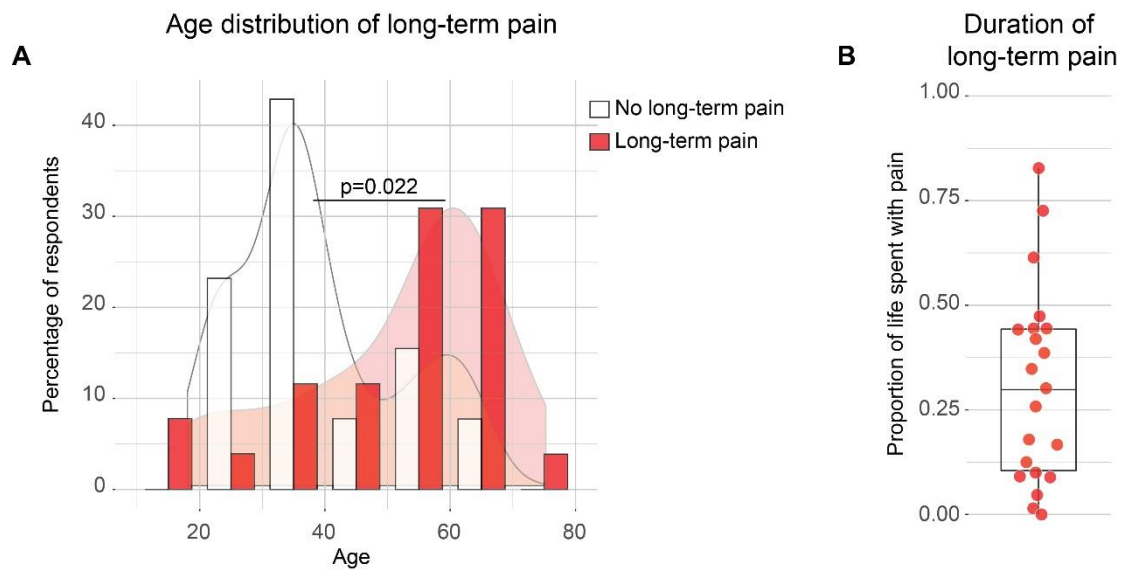

**Supplementary figure A.1. Patients with mitochondrial disease experience chronic pain.**

(A) Age distribution of respondents who reported chronic pain (red) or no chronic pain (white) ( $p=0.022$ ; Wilcoxon test). (B) The proportion of their life that respondents who report chronic pain spent with this pain ((current age - age of onset)/current age). Box-and-whisker plot depicts median, interquartile range (box) and 1.5IQR below and above the first and third quartiles respectively (whiskers). Datapoints indicate individual responses.

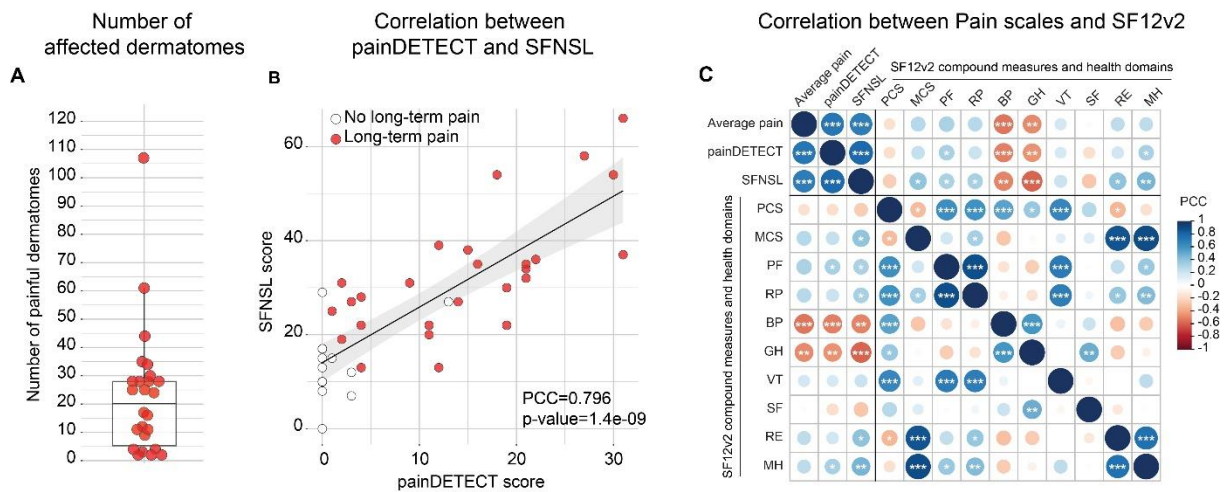

**Supplementary figure A.2. Chronic pain is often of neuropathic character.** (A) Number of dermatomes in which chronic pain is reported on the body chart by respondents who experience chronic pain. (B) Correlation between painDETECT and SFNSL scores. PCC: Pearson's correlation coefficient. Datapoints indicate individual responses. (C) Correlation matrix between average pain intensity, PainDETECT, SFNSL scores and norm-based measures of the SF12v2. The colour scale shows the Pearson Correlation Coefficient (PCC); size of the circle reflects statistical significance, with non-adjusted p-value intervals indicated by the number of asterisks; \* ( $p < 0.05$ ), \*\* ( $p < 0.01$ ), \*\*\* ( $p < 0.001$ ). PCS, physical component score; MCS, mental component score; PF, physical functioning; RP, role physical; BP, bodily pain; GH, general health; VT, vitality; SF, social functioning; RE, role emotional; MH, mental health.

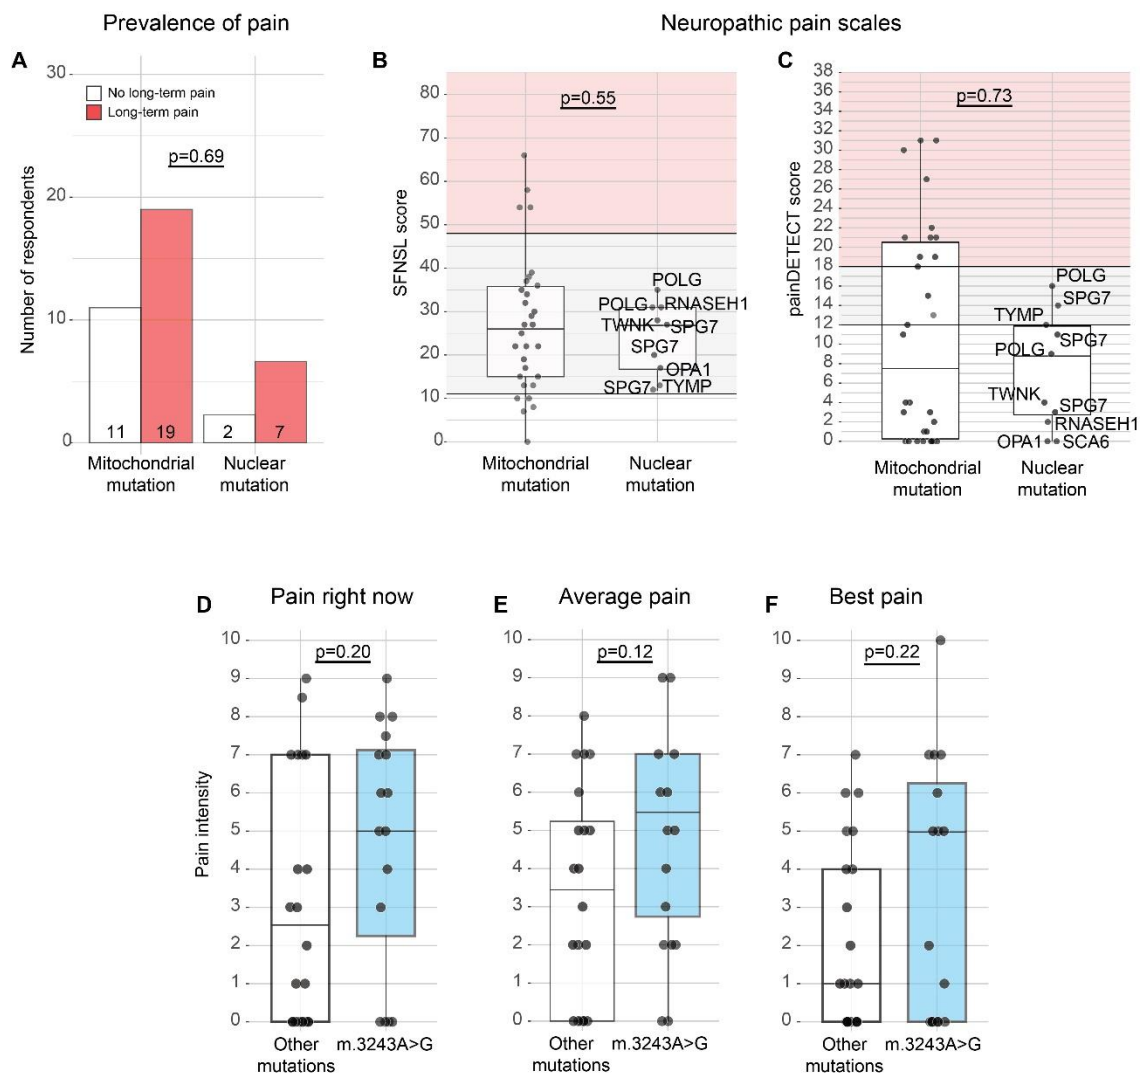

**Supplementary figure A.3. Association between pain symptoms and the underlying genetic mutation.** (A) Number of respondents with (red) or without (white) chronic pain who have a mitochondrial or a nuclear mutation as the cause of their mitochondrial disease (Fisher's exact test). (B,C) SFNSL (B) and painDETECT (C) scores in respondents with nuclear or mitochondrial mutations (t-test, B; Wilcoxon test, C). Grey and red shaded areas indicate possible and likely neuropathic pain respectively. (D-F) Current (D), average (E) and best (F) pain intensity in patients with (blue) or without (white) the m.3243A>G mitochondrial mutation (Wilcoxon test). Box-and-whisker plots depict median, interquartile range (box) and 1.5IQR below and above the first and third quartiles respectively (whiskers). Datapoints indicate individual responses.

| <b>Patient</b> | <b>Mutation</b> | <b>Gender</b> | <b>Age</b> |
|----------------|-----------------|---------------|------------|
| 040*           | m.3243A>G       | F             | 52         |
| 041            | m.3243A>G       | F             | 58         |
| 042            | m.3243A>G       | F             | 37         |
| 043            | m.13513G>A      | M             | 60         |
| 044            | POLG            | F             | 71         |
| 045            | Unknown         | Unknown       | Unknown    |
| 046            | TYMP            | F             | 28         |
| 047            | Unknown         | Unknown       | Unknown    |
| 048            | m.3243A>G       | F             | 49         |
| 049            | RRM2B           | F             | 33         |
| 050            | m.7512T>C       | F             | 34         |
| 051            | RRM2B           | F             | 38         |
| 052            | m.3243A>G       | F             | 20         |
| 053            | m.3243A>G       | F             | 24         |
| 054            | OPA1            | F             | 19         |
| 055            | Unknown         | Unknown       | Unknown    |
| 056            | Unknown         | Unknown       | Unknown    |
| 057            | m.11778A>G      | M             | 40         |
| 058            | m.3243A>G       | F             | 40         |
| 059            | Unknown         | Unknown       | Unknown    |
| 060            | m.3243A>G       | F             | 19         |
| 061            | m.3460G>A       | F             | 49         |
| 062            | Single deletion | F             | 51         |
| 063            | Unknown         | Unknown       | Unknown    |
| 064            | Unknown         | Unknown       | Unknown    |
| 065            | Unknown         | Unknown       | Unknown    |
| 066            | Unknown         | Unknown       | Unknown    |

**Supplementary table A.1. Demographics and genetic diagnosis of non-responders.**

Questionnaires were handed out during the clinic as part of a service evaluation, and 9 of these questionnaires were lost to follow-up (Unknown). Non-responders were on average younger ( $38.2 \pm 15$  years) than responders ( $47.1 \pm 16.1$  years), but not significantly ( $p=0.072$ ; Wilcoxon test). \*Patient 040 did return the survey, but question 1 (Have you had long-term pain in the past 6 months?) was not completed.

**Supplementary table A.2. Overview of all answers to the survey.** The table is provided as a separate .xlsx file and includes all questions that were part of the survey. Answers are coded according to the scoring manuals of each respective questionnaire.
